# Supplementary material for: Cardiac neurons expressing a glucagon-like receptor mediate cardiac arrhythmia induced by high-fat diet in Drosophila
Source: eLife. 2026 Mar 6;13:RP94512. doi: 10.7554/eLife.94512 (PMC12965717; doi:10.7554/eLife.94512)
Supplement: Figure 2—source data 1. [file elife-94512-fig2-data1.xlsx]

## Sheet: Sheet1
Figure 2B
NFD	HFD
-0.0602878	0.402264
0.0522233	0.325045
0.00806446	0.797104
Figure 2D
NFD	HFD
1.29766	2.97245
2.3651	5.81091
1.46774	1.99735
0.771945	3.38973
1.0149	1.66444
0.624154	3.64374
1.90245	3.05771
1.5607	2.55853
1.01296	1.85911
0.505373	2.34511
0.413744
0.316632
0.455844
0.290806
Figure 2F
NFD	HFD
1.041	2.1045
0.6351	0.5513
0.5086	4.2457
0.8089	3.7112
0.9023	1.2842
1.1601	3.2576
1.4084	2.4304
1.5356
Figure 2-figure supplement 1B
NFD	HFD
90.5446	900.112
110.352	1055.56
83.8442	699.246
83.1373	586.069
83.8481	785.873
76.2248	870.293
71.7558
108.772
