# Supplementary material for: Cardiac neurons expressing a glucagon-like receptor mediate cardiac arrhythmia induced by high-fat diet in Drosophila
Source: eLife. 2026 Mar 6;13:RP94512. doi: 10.7554/eLife.94512 (PMC12965717; doi:10.7554/eLife.94512)
Supplement: Figure 3—source data 1. [file elife-94512-fig3-data1.xlsx]

## Sheet: Sheet1
Figure 3B
	NFD															HFD
Control	0.175884	0.252122	0.140253	0.11963	0.168831	0.239925	0.15008	0.0879593	0.248043	0.132824	0.0434017	0.0707628	0.08337	0.0926581	0.0901089	0.2289	0.3156	0.4362	0.3163	0.4141	0.1902	0.4092	0.4212	0.4501	0.1027	0.1267	0.1428	0.3872
Akh-IR	0.1787	0.2478	0.231	0.41	0.1769	0.103	0.0977	0.3013	0.1158	0.128	0.1286	0.1112	0.3554			0.3124	0.2435	0.0941	0.1764	0.2267	0.2086	0.1095	0.173	0.3775	0.1452	0.1721	0.1992	0.2593	0.0815
Figure 3-figure supplement 1
Control	Akh-IR
1.3045	0.0879
0.8171	0.3127
0.7507	0.1504
1.1276	0.1262
