# Supplementary material for: Cardiac neurons expressing a glucagon-like receptor mediate cardiac arrhythmia induced by high-fat diet in Drosophila
Source: eLife. 2026 Mar 6;13:RP94512. doi: 10.7554/eLife.94512 (PMC12965717; doi:10.7554/eLife.94512)
Supplement: Figure 4—source data 1. [file elife-94512-fig4-data1.xlsx]

## Sheet: Sheet1
Figure 4A
NFD	HFD
0.13135	1.42071
0.462032	0.915795
-0.593382	0.928604
Figure 4B
	NFD														HFD
Control	0.169946	0.297299	0.062933	0.072691	0.352958	0.3604	0.138513	0.079563	0.0701164	0.148151	0.117241	0.20137	0.130209	0.150153	0.270559	0.156985	0.0643638	0.209697	0.350062	0.503978	0.469355	0.221359	0.282315	0.448965	0.239565	0.399715
AkhRnull	0.119575	0.139713	0.146222	0.0678887	0.128387	0.104853	0.112382	0.0450757	0.0701728	0.087365	0.113937	0.383455	0.129428		0.0745674	0.0891872	0.0672966	0.0571237	0.072707	0.234286	0.130994	0.120128	0.127899	0.231233	0.155119
