# Supplementary material for: Cardiac neurons expressing a glucagon-like receptor mediate cardiac arrhythmia induced by high-fat diet in Drosophila
Source: eLife. 2026 Mar 6;13:RP94512. doi: 10.7554/eLife.94512 (PMC12965717; doi:10.7554/eLife.94512)
Supplement: Figure 6—source data 1. [file elife-94512-fig6-data1.xlsx]

## Sheet: Sheet1
Figure 6C
Control	AkhR-Gal4>rpr
0.169946	1.25104
0.297299	1.1915
0.062933	1.06121
0.072691	0.926227
0.352958	0.848612
0.3604	0.724421
0.138513	0.688818
0.079563	0.683651
0.0701164	0.540583
0.148151	0.479665
0.117241	0.458621
0.20137	0.432325
0.130209	0.403596
0.150153	0.392381
	0.391174
	0.363084
	0.350978
	0.331482
	0.245216
	0.218384
	0.154027
	0.148487
	0.0920382
